# Supplementary material
Source: PubMed Central journal article supplement (PMC2902717)

S2/pINS

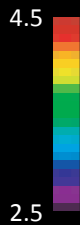

$z = 21$

$x = 43$

$y = -24$

Hc/pHc

$x = 31$

$z = -10$

$x = -32$

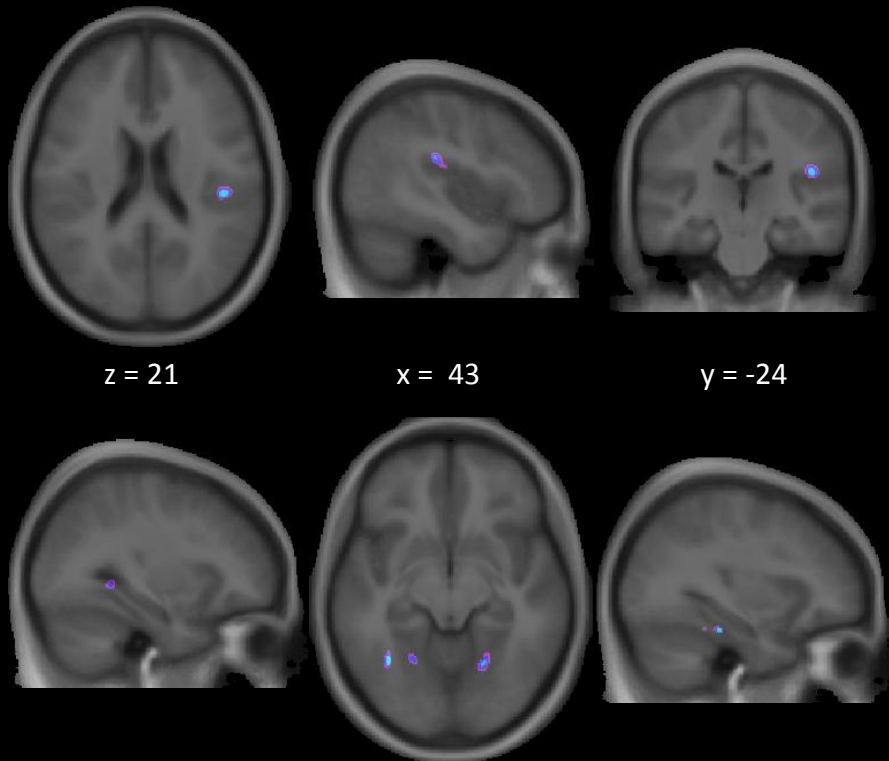

Supplement: NIHMS193295-supplement-02.pdf [file NIHMS193295-supplement-02.pdf]
